# Supplementary material for: A Novel Neoplastic Fusion Transcript, RAD51AP1-DYRK4 , Confers Sensitivity to the MEK Inhibitor Trametinib in Aggressive Breast Cancers
Source: Oxford University Press journal article supplement (doi:10.1158/1078-0432.ccr-20-2769), 2020-11-10
Supplement: 10780432ccr202769-sup-247400_2_supp_6686617_qwy56l.docx [file 10780432ccr202769-sup-247400_2_supp_6686617_qwy56l.docx]

**SUPPLEMENTARY FIGUERS**

**
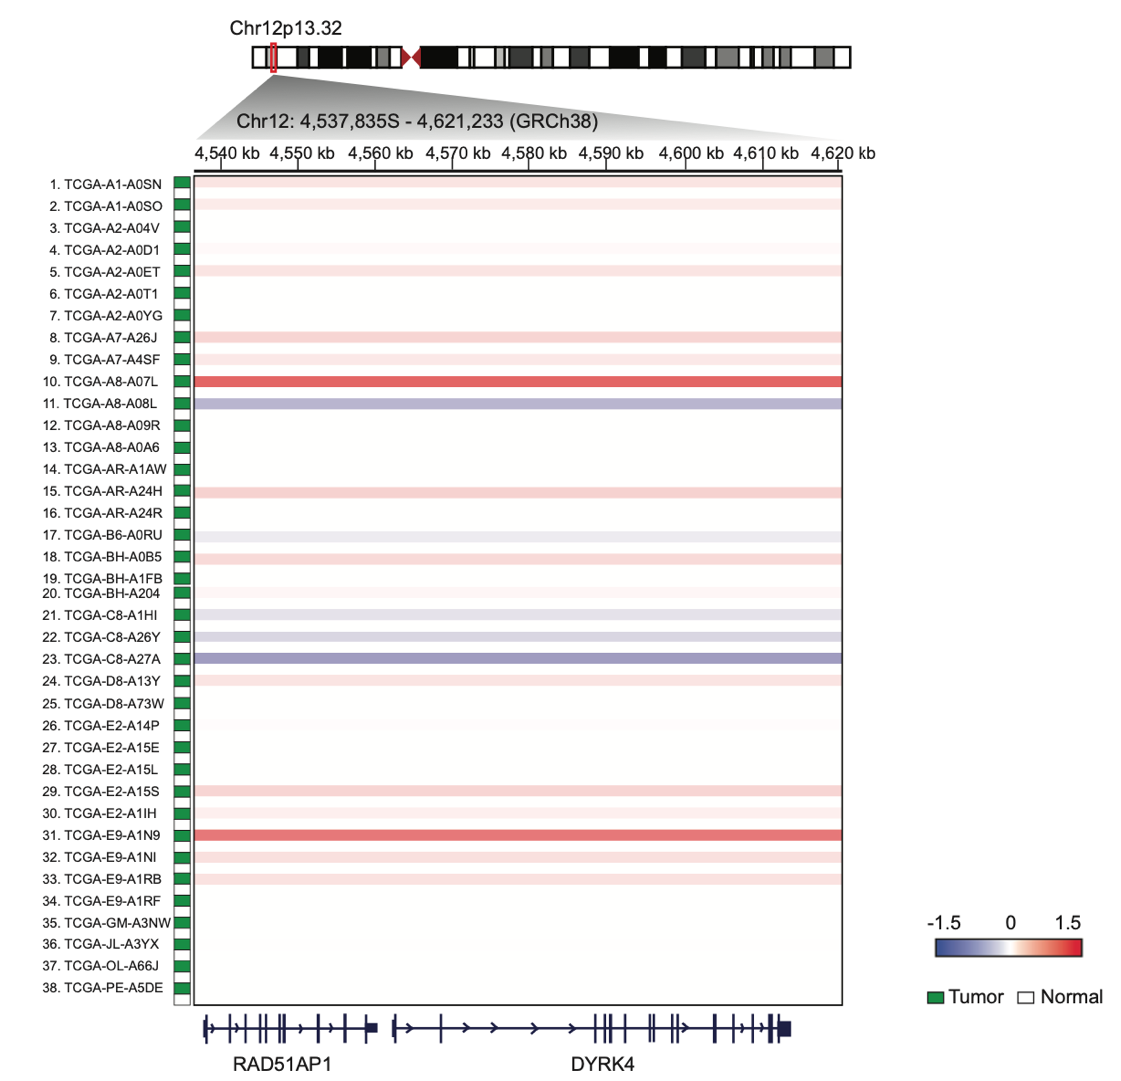
**

**Supplementary Figure S1**. **Copy number data of RAD51AP1-DYRK4 loci in the fusion positive TCGA cases (N=38).** Log 2 transformed copy number data for breast tumors and paired normal blood samples from TCGA are shown in the figure.

**
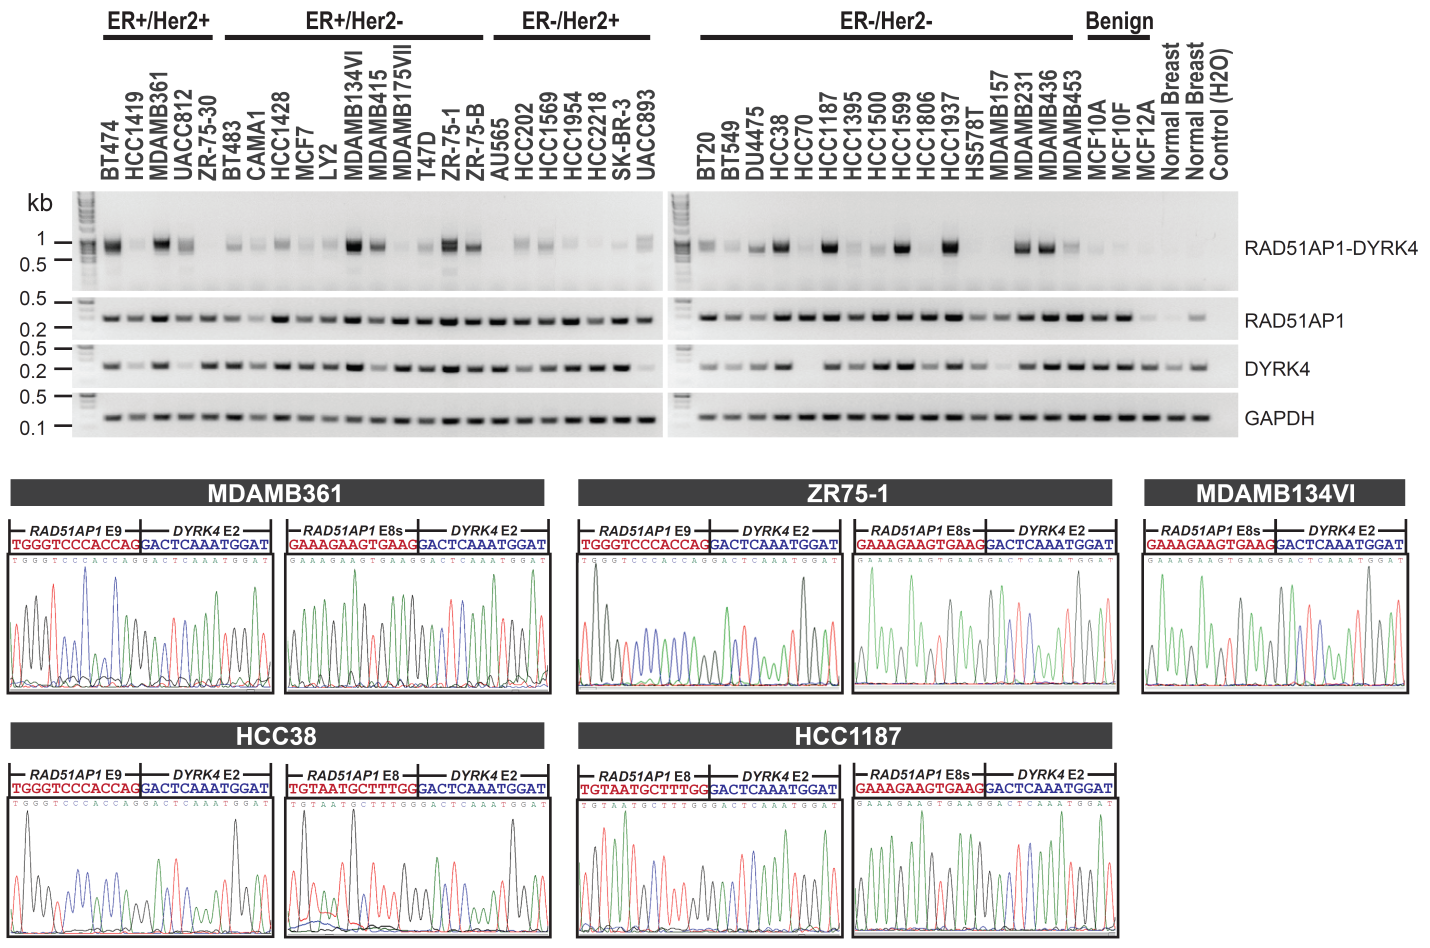
**

**Supplementary Figure S2**. **Expression of *RAD51AP1-DYRK4* transcripts in breast cancer cell lines detected by RT-PCR.** RT-PCR of *RAD51AP1-DYRK4* was done using a forward primer in the first exon of *RAD51AP1* and a reverse primer in the second exon of *DYRK4*. The representative chromatograms of the fusion junction of each *RAD51AP1-DYRK4* variant are shown in the lower panel. RT-PCR analysis of wt*RAD51AP1* and wt*DYRK4* was performed as controls. The HCC38 cell line shown here is a lineage passed in our lab that overexpress RAD51AP1-DYRK4, which is different from the HCC38 lineage newly purchased lineage from ATCC shown in **Fig. 5b** and **Supplementary Fig. 6**.


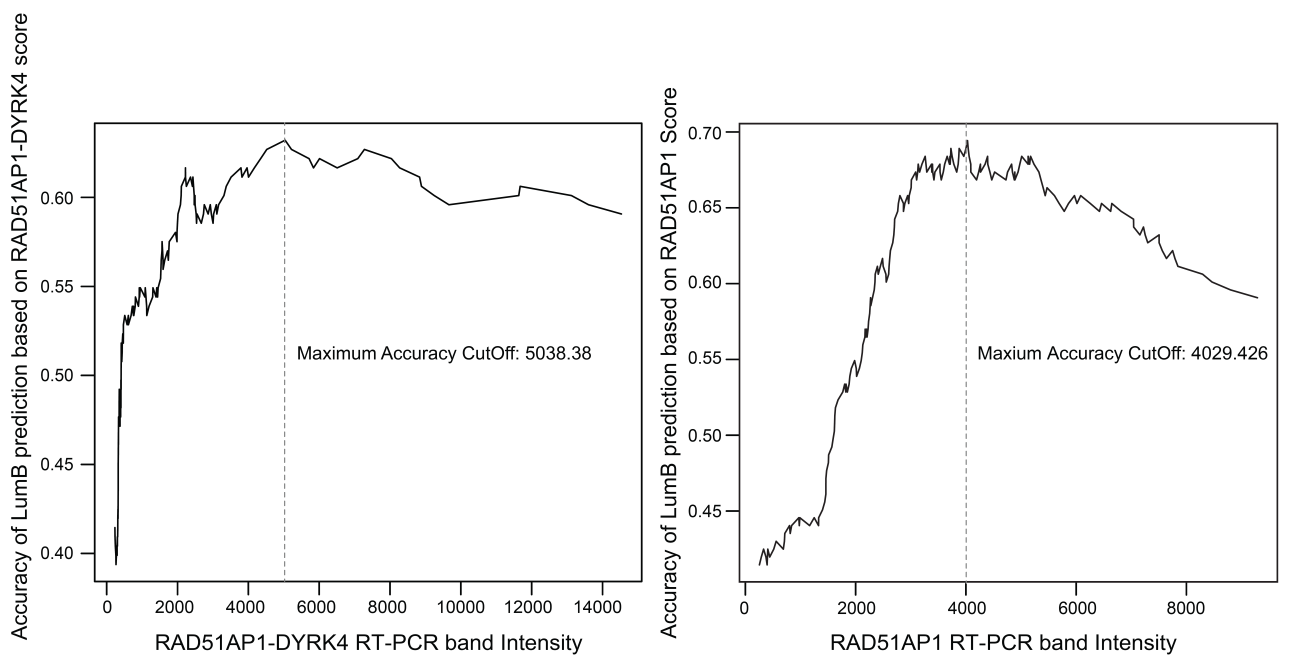


**Supplementary Figure S3. ROC analysis to determine the optimal cutoff of *RAD51AP1-DYRK4* and wt*RAD51AP1* overexpression based on RT-PCR band intensities.** The *RAD51AP1-DYRK4* and *RAD51AP1* RT-PCR band intensities observed in breast tumor tissues were quantified using ImageJ software, and the ROCR module of the R statistical package was used to evaluate the optimal cutoffs for *RAD51AP1-DYRK4* and *RAD51AP1*overexpression.


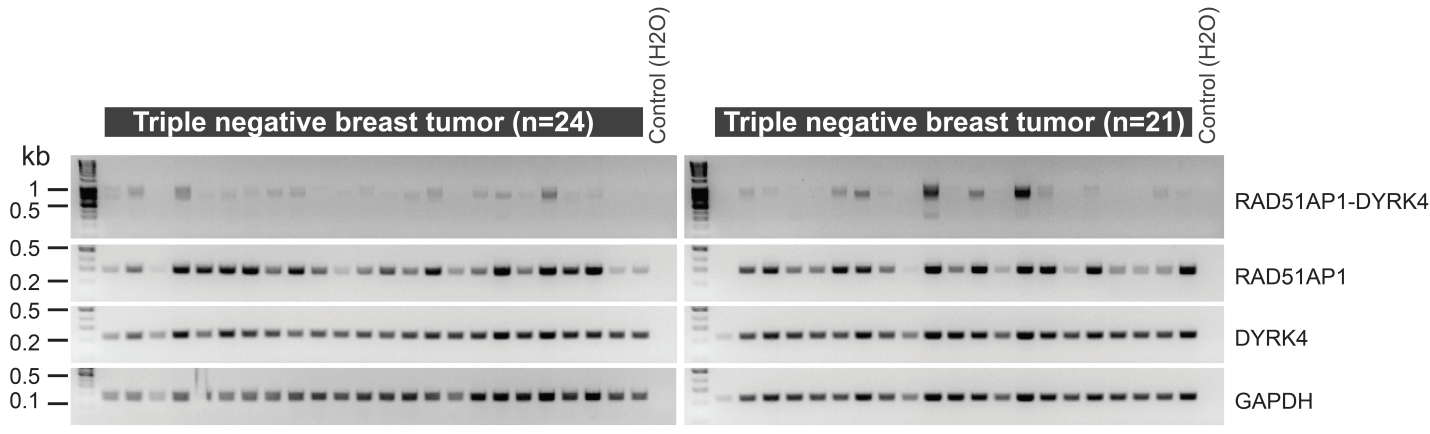


**Supplementary Figure S4**. **Expression of *RAD51AP1-DYRK4* chimerical transcripts in triple-negative breast cancer tissues detected by RT-PCR.** RT-PCR of *RAD51AP1-DYRK4* was performed using a forward primer in the first exon of *RAD51AP1* and a reverse primer in the second exon of *DYRK4.* RT-PCR analysis of wt*RAD51AP1* and wt*DYRK4* was performed as controls.

**Supplementary Figure S5. Western blot analysis of T47D cells transiently expressing RAD51AP1-DYRK4 variants Flag-tagged at the 3’ end of the ΔRAD51AP1 ORF (*) or at the 3’ end of the DYRK4 ORF (#) using an anti-Flag antibody.** The Flag-tagged wtRAD51AP1 and wtDYRK4 are used as controls. Solid arrows indicate the Flag-tagged ΔRAD51AP1 protein bands; white arrowheads indicate the Flag-tagged wtRAD51AP1 protein bands.


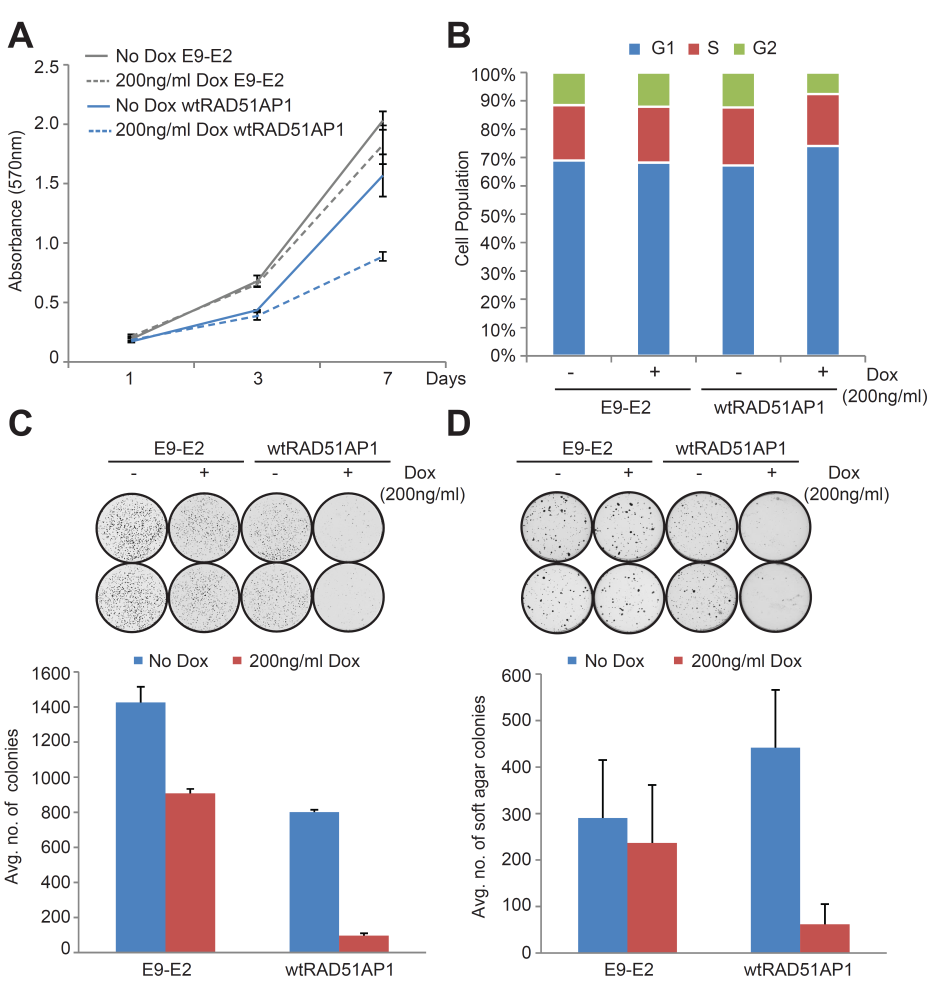
**Supplementary Figure S6**.  **Functional impact of ectopic RAD51AP1-DYRK4 expression in T47D breast cancer cells *in vitro*.** (**A**) RAD51AP1-DYRK4 did not significantly impact the proliferation of T47D breast cancer cells while wtRAD51AP1 overexpression had a repressing effect on cell proliferation. (**B**) Ectopic expression of RAD51AP1-DYRK4 did not affect the T47D cell cycle progression, whereas wtRAD51AP1 increased the G1 cell population. (**C-D**) The effect of RAD51AP1-DYRK4 ectopic expression on the (**C**) colony-formation and (**D**) anchorage-independent growth of T47D cells.

**A**

**B**

**Supplementary Figure S7. Quantitative Reverse Transcription PCR of RAD51AP1-DYRK4 (E9E2), wtRAD51AP1, or wtDYRK4 in the breast cancer cell lines used in this study. (A)** qPCR primers are designed to detect E9-E2, E8E2 and E8sE2 fusion variants, wtRAD51AP1, or wtDYRK4.Here the HCC38 cell line is a newly purchased lineage from ATCC. This lineage does not overexpress RAD51AP1-DYRK4 which is different from the HCC38 lineage passed in the lab (shown in **Supplementary Fig. S2**). (**B**) Knockdown efficiency of siRNAs assessed by real-time PCR in MDAMB361 cells, using the primer pairs detecting wtRAD51AP1 (left), E9-E2 fusion (middle), or DYRK4(right).

**Supplementary Figure S8. Detecting endogenous RAD51AP1-DYRK4 protein in MDAMB361 cells using the customized antibody specifically against the DYRK4 frame-shift peptide.**Endogenous RAD51AP1-DYRK4 protein was detected in the MDAMB361 fusion-positive cells treated with control siRNA (siCtrl), DYRK4 siRNAs, 5’RAD51AP1 siRNAs, or 3’RAD51AP1 siRNAs using the customized antibody against the DYRK4 frameshift peptide, as well as wtRAD51AP1 and wtDYRK4 polyclonal antibodies. T47D cells inducibly expressing E9-E2 fusion or wtRAD51AP1 are used as positive controls. The fusion-negative breast cancer cell line ZR-75-30 and HCC70, and benign breast epithelial cell line MCF12A are used as negative controls.

**
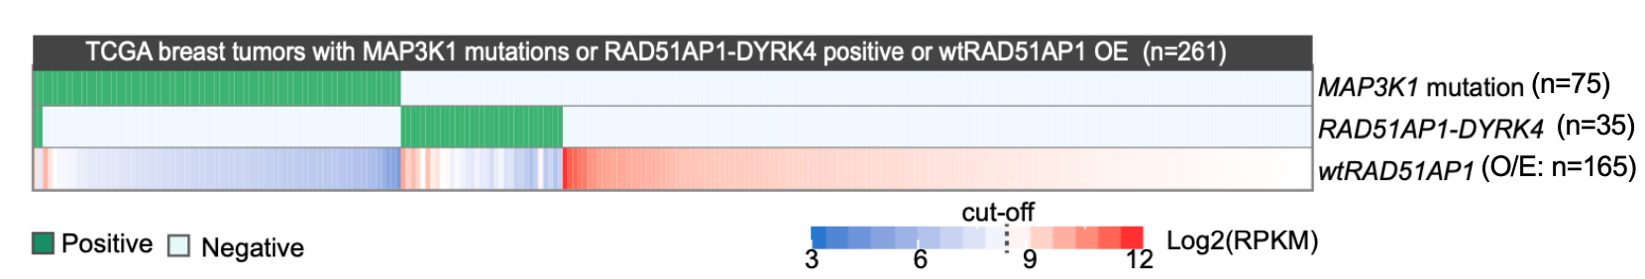
Supplementary Figure S9. TCGA tumors positive for MAP3K1 mutation or RAD51AP1-DYRK4, as well as the TCGA tumors overexpressing wtRAD51AP1.** TCGA RNAseq and exome sequencing data revealed that MAP3K1 nonsynonymous mutations is rare in the breast tumors overexpressing RAD51AP1-DYRK4 or wild-type RAD51AP1. The green color is representative of positive cases. O/E: overexpression. The cutoff for wtRAD51AP1 overexpression (>=8.6278) is defined based on median plus median absolute deviation (adjusted by default scale factor in R).

**SUPPLEMENTARY TABLES**

**Supplementary Table S1. Tumor-specific recurrent fusion candidates that are expressed in >1% of breast tumors and significantly enriched in luminal B tumors compared to luminal A tumors.** Note: >>, 5' and 3' genes locate at the same strand with 5' gene placed upstream of 3' gene; <<5' and 3' genes locate at the same strand but 3' gene is placed upstream of 5' gene; <> 5' and 3' genes are in different strand. The p values are calculated based on z-test comparing the difference between proportions. *These two ESR1-CCDC170+ cases are marginal cases supported by two fusion reads. AdjN, paired adjacent normal breast tissues. Dist, Distance.

| Fusion | Type | Placement | Dist(kb) | 5'ConSig | 3'ConSig | Median Supporting Reads (n) | Tumor% (n=1059) | Benign% (n=111) | Basal (n=139) | Her2 (n=67) | LumA (n=418) | LumB (n=192) | p-Value (LumB:A) |
| --- | --- | --- | --- | --- | --- | --- | --- | --- | --- | --- | --- | --- | --- |
| *GAL3ST2-NEU4* | adjacent | >> | 12.00 | 0.22 | 0.33 | 461.50 | 4.91% | 0.00% | 0.00% | 19.40% | 4.07% | 7.29% | 4.61% |
| ***RAD51AP1-DYRK4*** | **neighbor** | **>>** | **53.00** | **1.05** | **0.80** | **387.00** | **3.59%** | **0.00%** | **2.16%** | **7.46%** | **2.63%** | **6.77%** | **0.73%** |
| *UBE2J2-FAM132A* | neighbor | >> | 8.00 | 0.52 | 0.36 | 178.00 | 2.74% | 0.00% | 7.19% | 1.49% | 1.67% | 4.69% | 1.53% |
| *ARHGAP11A-SCG5* | neighbor | >> | 48.00 | 1.01 | 0.77 | 1466.00 | 2.64% | 0.00% | 6.47% | 0.00% | 1.91% | 4.69% | 2.66% |
| *IFI6-FRMD5* | interchr | - | - | 0.91 | 0.51 | 5.00 | 2.17% | 0.00% | 2.88% | 4.48% | 1.20% | 5.21% | 0.15% |
| *LINC00176-TCEA2* | adjacent | >> | 30.00 | 0.00 | 1.07 | 5.00 | 1.98% | 0.00% | 0.72% | 2.99% | 0.72% | 7.29% | 0.00% |
| *METTL8-RERG* | interchr | - | - | 0.43 | 1.04 | 5.50 | 1.89% | 0.00% | 0.00% | 0.00% | 1.91% | 5.73% | 0.59% |
| *ESR1-CCDC170* | neighbor | << | 329.00 | 3.58 | 0.58 | 12.50 | 1.70% | 0.00% | 0.00% | 1.49% | 1.44% | 4.69% | 0.80% |
| *PRR11-SMG8* | neighbor | >> | 14.00 | 0.77 | 0.30 | 1735.00 | 1.61% | 0.00% | 4.32% | 5.97% | 0.48% | 2.60% | 1.10% |
| *KIAA0101-CSNK1G1* | neighbor | >> | 9.00 | 1.11 | 1.30 | 3.50 | 1.51% | 0.00% | 2.88% | 1.49% | 0.72% | 3.65% | 0.41% |
| *P2RY6-ARHGEF17* | neighbor | >> | 67.00 | 0.67 | 1.36 | 5.00 | 1.42% | 0.00% | 1.44% | 4.48% | 0.72% | 3.13% | 1.10% |
| *WDR35-TTC32* | neighbor | >> | 8.00 | 0.64 | 0.17 | 5.50 | 1.13% | 0.00% | 1.44% | 1.49% | 0.72% | 2.60% | 2.86% |
| *CPSF6-C9orf3* | interchr | - | - | 1.06 | 0.79 | 4.00 | 1.04% | 0.00% | 4.32% | 0.00% | 0.24% | 1.56% | 3.00% |
| *HDAC6-ERAS* | adjacent | >> | 4.00 | 1.39 | 0.78 | 2349.00 | 1.04% | 0.00% | 0.00% | 0.00% | 0.24% | 3.13% | 0.09% |
| *HNRNPH1-CANX* | adjacent | <> | 92.00 | 1.24 | 1.45 | 4.00 | 1.04% | 0.00% | 0.72% | 1.49% | 0.48% | 2.60% | 1.10% |
| *N4BP3-RMND5B* | neighbor | >> | 20.00 | 0.55 | 0.82 | 6.00 | 1.04% | 0.00% | 0.00% | 0.00% | 0.96% | 3.13% | 2.51% |

| **Supplementary Table S2. The clinical information of RAD51AP1-DYRK4 and/or ESR1-CCDC170 positive cases based on the TCGA RNAseq dataset.** IND, Indeterminate. NA, Not Available. | | | | | | | | | | | | | | |
| --- | --- | --- | --- | --- | --- | --- | --- | --- | --- | --- | --- | --- | --- | --- |
| TCGA Patient ID | Age | Gender | Menopause | RAD51AP1-DYRK4 reads(n) | ESR1-CCDC170 status | PAM50 (RNAseq) | Histology | ER(IHC) | PR(IHC) | Her2(IHC) | T | N | M | AJCC Stage |
| TCGA-A1-A0SO | 67 | F | Post | 2452 |  | Basal | Ductal | - | - | Equivocal | T2 | N1 | M0 | IIB |
| TCGA-AR-A24H | 65 | F | Post | 1796 |  | LumB | Lobular | + | + | - | T2 | N0 | M0 | IIA |
| TCGA-D8-A13Y | 52 | F | Post | 1562 |  | LumB | Ductal | + | + | - | T1c | N0 | M0 | IA |
| TCGA-BH-A204 | 80 | F | Post | 1522 |  | LumB | Ductal | NA | NA | NA | T2 | N1b | M0 | IIB |
| TCGA-A7-A26J | 49 | F | Pre | 1501 |  | LumA | Ductal | + | + | - | T2 | N0 | M0 | IIA |
| TCGA-E9-A1N9 | 58 | F | Post | 1493 |  | Basal | Mixed | - | + | + | T2 | N0 | M0 | IIA |
| TCGA-A8-A07L | 58 | F | Post | 1291 |  | LumB | Ductal | + | + | - | T3 | N1a | M0 | IIIA |
| TCGA-E9-A1RB | 40 | F | Pre | 1100 |  | LumB | Ductal | NA | NA | NA | T2 | N0 | M0 | IIA |
| TCGA-E2-A15S | 34 | F | Post | 1073 |  | LumB | Ductal | + | - | Equivocal | T2 | N1 | M0 | IIB |
| TCGA-C8-A27A | 48 | F | Peri | 974 |  | LumB | Ductal | + | + | - | T2 | N1 | M0 | IIB |
| TCGA-B6-A0RU | 49 | F | IND | 643 |  | Basal | Other | - | - | NA | T1c | N0 (i-) | M0 | IA |
| TCGA-AR-A24R | 45 | F | Pre | 585 | + | LumB | Ductal | + | + | - | T1 | N2 | M0 | IIIA |
| TCGA-AR-A1AW | 65 | F | Post | 505 |  | LumB | Ductal | + | + | Equivocal | T2 | N0 | M0 | IIA |
| TCGA-A2-A0YG | 63 | F | Post | 504 | + | LumB | Ductal | + | + | + | T2 | N3a | M0 | IIIC |
| TCGA-C8-A26Y | 90 | F | Post | 489 |  | Her2 | Ductal | - | - | - | T2 | N0 | M0 | IIA |
| TCGA-A8-A08L | 89 | F | Post | 455 |  | Her2 | Ductal | + | - | - | T3 | N2a | M0 | IIIA |
| TCGA-A1-A0SN | 50 | F | Post | 442 | + | LumB | Ductal | + | + | + | T1c | N1 | MX | IIA |
| TCGA-JL-A3YX | 46 | F | Post | 437 |  |  | Lobular | + | + | + | T2 | N0 | M0 | IIA |
| TCGA-E2-A15L | 65 | F | Post | 393 |  | LumA | Lobular | + | + | Equivocal | T2 | N0 | M0 | IIA |
| TCGA-A2-A0ET | 58 | F | Post | 381 |  | LumA | Ductal | + | + | Equivocal | T2 | N2a | M0 | IIIA |
| TCGA-A2-A04V | 39 | F | Pre | 381 |  | LumA | Ductal | + | + | Equivocal | T2 | N0 (i-) | M0 | IIA |
| TCGA-A7-A4SF | 54 | F | Post | 364 |  |  | Ductal | + | - | + | T2 | N0 | M0 | IIA |
| TCGA-A2-A0D1 | 76 | F | Post | 362 |  | Her2 | Ductal | - | - | + | T2 | N0 (i-) | M0 | IIA |
| TCGA-E9-A1NI | 51 | F | Post | 336 |  | LumB | Mixed | + | + | - | T2 | N0 | M0 | IIA |
| TCGA-A2-A0T1 | 55 | F | Post | 312 |  | Her2 | Ductal | - | - | + | T3 | N3 | M0 | IIIC |
| TCGA-E2-A14P | 79 | F | Post | 279 |  | Her2 | Ductal | - | - | + | T2 | N3 | M0 | IIIC |
| TCGA-E2-A1IH | 80 | F | Post | 257 |  | LumA | Lobular | + | + | Equivocal | T1c | N0 | M0 | I |
| TCGA-OL-A66J | 80 | F | Post | 247 |  |  | Lobular | + | + | NA | T1c | N0 | MX | I |
| TCGA-A8-A09R | 82 | F | Post | 247 |  | LumB | Ductal | + | + | - | T2 | N1 | M0 | IIB |
| TCGA-BH-A1FB | 60 | F | Post | 235 |  | LumA | Ductal | + | + | - | T2 | N1b | M0 | IIB |
| TCGA-GM-A3NW | 63 | F | Post | 225 |  |  | Lobular | - | + | Equivocal | T2 | N0 (i-) | M0 | IIA |
| TCGA-C8-A1HI | 40 | F | Pre | 195 |  | LumA | Ductal | + | + | - | T2 | N2 | M0 | IIIA |
| TCGA-PE-A5DE | 41 | F | Pre | 191 |  |  | Lobular | + | + | - | T2 | N0 | M0 | IIA |
| TCGA-BH-A0B5 | 40 | F | Pre | 186 |  | LumA | Lobular | + | + | - | T2 | N2a | M0 | IIIA |
| TCGA-D8-A73W | 79 | F | Post | 155 |  |  | Mucinous | + | - | - | T3 | N1a | MX | IIIA |
| TCGA-A8-A0A6 | 64 | F | Post | 151 |  | LumA | Lobular | + | + | - | T2 | N3a | M0 | IIIC |
| TCGA-E9-A1RF | 68 | F | Post | 135 |  | LumA | Ductal | NA | NA | NA | T2 | N2 | M0 | IIIA |
| TCGA-E2-A15E | 40 | F | Pre | 129 |  | LumA | Ductal | + | + | NA | T1c | N1a | M0 | IIA |
| TCGA-D8-A27N | 36 | F | Pre |  | + | LumB | Ductal | + | + | + | T2 | N2a | M0 | IIIA |
| TCGA-D8-A1XA | 64 | F | Post |  | + | LumA | Ductal | + | + | Equivocal | T1c | N0 | M0 | IA |
| TCGA-D8-A1JP | 73 | F | Post |  | + | LumA | Ductal | + | + | - | T1c | N0 | M0 | IA |
| TCGA-BH-A1FD | 68 | F | Post |  | + | LumB | Ductal | + | + | - | T1c | N0 | M0 | I |
| TCGA-BH-A1EY | 79 | F | Post |  | + | LumA | Ductal | + | + | - | T2 | N0 | M0 | IIA |
| TCGA-BH-A18R | 50 | F | NA |  | + | Her2 | Ductal | IND | - | + | T2b | N1 | M0 | IIA |
| TCGA-BH-A0HY | 60 | F | Post |  | + | LumB | Ductal | + | - | + | T1c | N0 | M0 | I |
| TCGA-BH-A0C7 | 48 | F | Peri |  | +* | LumB | Ductal | + | - | NA | T2 | N1mi | M0 | IIB |
| TCGA-BH-A0C0 | 62 | F | Post |  | + | LumB | Ductal | + | + | Equivocal | T1c | N1a | M0 | IIA |
| TCGA-BH-A0B1 | 66 | F | Post |  | + | LumA | Ductal | + | + | - | T2 | N1a | M0 | IIB |
| TCGA-AN-A0FW | 67 | F | Post |  | +* | LumA | Ductal | + | IND | - | T2 | N2 | M0 | IIIA |
| TCGA-AN-A0AK | 76 | F | Post |  | + | LumB | Ductal | + | - | + | T2 | N0 | M0 | IIA |
| TCGA-AC-A3OD | 68 | F | Post |  | + | LumA | Lobular | + | + | - | T2 | N1mi | MX | IIB |
| TCGA-A8-A09Q | 83 | F | Post |  | + | LumB | Ductal | + | + | - | T4b | N2a | M0 | IIIB |
| TCGA-A8-A08P | 70 | F | Post |  | + | LumB | Ductal | + | + | + | T2 | N2a | M0 | IIIA |
| TCGA-A7-A4SC | 62 | F | Post |  | + |  | Lobular | + | - | Equivocal | T3 | N0 | MX | IIB |
| TCGA-A2-A4S3 | 59 | F | Post |  | + |  | Ductal | + | + | - | T2 | N1a | M0 | IIB |
| TCGA-A2-A25B | 39 | F | Pre |  | + | LumB | Ductal | + | + | Equivocal | T2 | N1 | M0 | IIB |
| TCGA-A2-A0CT | 71 | F | Post |  | + | LumA | Ductal | + | - | Equivocal | T2 | N0 (i-) | M0 | IIA |
| TCGA-A1-A0SM | 77 | M | NA |  | + | LumA | Ductal | + | - | + | T2 | N0 (i-) | M0 | IIA |

| **Supplementary Table S3. Clinical information for the ER-positive breast tumor samples analyzed by reverse transcription PCR in this study. The Ki67 scores are derived from our previous study (Nat Commun. 2014; 5:4577).** MP stat, Menopausal status. NA, Not Available. | | | | | | | | | | | | | | | | |
| --- | --- | --- | --- | --- | --- | --- | --- | --- | --- | --- | --- | --- | --- | --- | --- | --- |
| Sample ID | | AGE | Sex | Race | *RAD51AP1-DYRK4* (RT-PCR band Intensity) | *RAD51AP1-DYRK4* Positivity | *RAD51AP1* (RT-PCR band Intensity) | *RAD51AP1* Overexpression | *ESR1-CCDC170* Status | MP stat | ER | PR | HER-2 | Grade | AJCC TNM | AJCC Stage | Ki67 Score (%) | |
| BT14 | | 53 | F | Caucasian | 5038.376 | + | 9288.912 | + | - | Post | + | + | - | 1 | T4N2M0 | IIIB | 56.00 | |
| BT36 | | 62 | F | Caucasian | 6008.861 | + | 8800.255 | + | + | Post | + | - | NA | 1 | T2N2M0 | IIIA | 64.07 | |
| BT79 | | 47 | F | Caucasian | 8273.276 | + | 8464.912 | + | Weak | NA | + | + | - | 1 | T1N1M0 | IIA | 44.00 | |
| BT109 | | 55 | F | Caucasian | 13605.74 | + | 7845.912 | + | - | Post | + | - | - | 1 | T2NXMX | IIA | 28.22 | |
| BT72 | | 44 | F | Caucasian | 14533.426 | + | 7561.912 | + | Weak | Pre | + | - | + | 1 | T2N2M0 | IIIA | 20.63 | |
| BT108 | | 46 | F | Caucasian | 9249.447 | + | 7252.033 | + | - | Pre | + | + | - | 1 | T3N1M0 | IIIA | 36.28 | |
| BT165 | | 58 | F | Caucasian | 7089.447 | + | 7156.326 | + | Weak | Post | + | + | NA | 1 | T1cN1M0 | IIB | 8.75 | |
| BT23 | | 58 | F | Caucasian | 8040.154 | + | 6647.397 | + | Weak | Post | + | + | - | 1 | T2N1M0 | IIB | 23.00 | |
| BT45 | | 61 | F | Caucasian | 8888.933 | + | 6460.619 | + | - | Post | + | + | - | 1 | T1cNXM0 | I | 38.00 | |
| BT144 | | 59 | F | Caucasian | 9664.104 | + | 6422.376 | + | - | Post | + | + | NA | 1 | T2NXM0 | IIA | 13.37 | |
| BT88 | | 47 | F | Caucasian | 13123.125 | + | 6082.619 | + | - | Pre | + | + | NA | 1 | T2N0M0 | IIA | 27.48 | |
| BT35 | | 52 | F | Caucasian | 11674.518 | + | 5472.497 | + | - | Pre | + | - | - | 1 | T2N2M0 | IIIA | 38.74 | |
| BT132 | | 54 | F | Caucasian | 5714.225 | + | 4844.912 | + | - | Post | + | + | NA | 2 | T1N1M0 | IIA | 24.69 | |
| BT130 | | NA | F | Caucasian | 6506.811 | + | 4756.205 | + | - | NA | + | + | NA | 1 | T1N2M0 | IIIA | 13.17 | |
| BT143 | | 68 | F | Caucasian | 8834.69 | + | 4089.79 | + | - | Post | + | + | - | 3 | T2NXM0 | IIA | 19.21 | |
| BT189 | | 48 | F | Caucasian | 11634.439 | + | 3860.083 | - | - | Pre | + | + | NA | 1 | T2N1M0 | IIB | 13.18 | |
| BT57 | | 43 | F | Caucasian | 7276.276 | + | 3660.74 | - | - | Pre | + | + | NA | 1 | T2N2M0 | IIIA | 15.68 | |
| BT26 | | 59 | F | Caucasian | 5217.569 | + | 3531.305 | - | - | Post | + | + | - | 1 | T2N1M0 | IIB | 44.56 | |
| BT70 | | 53 | F | Caucasian | 5838.983 | + | 2867.619 | - | - | Post | + | + | NA | 1 | T2N3M0 | IIIC | 13.15 | |
| BT160 | | 58 | F | Caucasian | 2470.79 | Weak | 8293.669 | + | Weak | Post | + | + | - | 1 | T1N0M0 | I | 32.25 | |
| BT113 | | 65 | F | Caucasian | 1578.426 | Weak | 7792.083 | + | + | Post | + | - | - | 1 | T1cN2M0 | IIIA | 36.13 | |
| BT52 | | 58 | F | Caucasian | 917.749 | Weak | 7638.154 | + | - | Post | + | + | - | 1 | T1cNXM0 | I | 2.92 | |
| BT137 | | 58 | F | Caucasian | 1717.841 | Weak | 7504.912 | + | Weak | Post | + | - | NA | 1 | T1cNXM0 | I | 51.92 | |
| BT135 | | 57 | F | Caucasian | 1941.598 | Weak | 7504.669 | + | Weak | Post | + | + | - | 1 | T2NXM0 | IIA | 43.43 | |
| BT110 | | 67 | F | Caucasian | 3819.79 | Weak | 7299.033 | + | Weak | Post | + | + | - | 1 | T2N0M0 | IIA | 0.39 | |
| BT164 | | 51 | F | Caucasian | 2755.326 | Weak | 7221.033 | + | - | NA | + | + | NA | 1 | T3N0MX | IIB | 19.75 | |
| BT181 | | 81 | F | Caucasian | 2452.719 | Weak | 7043.205 | + | Weak | Post | + | + | NA | 1 | T2N0MX | IIA | 15.50 | |
| BT44 | | 71 | F | Caucasian | 2223.548 | Weak | 7041.326 | + | - | Post | + | - | - | 1 | T2NXM0 | IIA | 41.00 | |
| BT106 | | 32 | F | Caucasian | 3017.376 | Weak | 6696.619 | + | - | Pre | + | - | + | 1 | T2NXM0 | IIA |  | |
| BT59 | | 53 | F | Caucasian | 3310.719 | Weak | 6626.033 | + | - | Pre | + | + | - | 1 | T2N1M0 | IIB | 3.29 | |
| BT24 | | 74 | F | Caucasian | 1985.012 | Weak | 6014.74 | + | Weak | Post | + | + | - | 1 | T2NXMX | IIA | 14.34 | |
| BT21 | | 69 | F | Caucasian | 1531.477 | Weak | 5861.69 | + | Weak | Post | + | - | - | 3 | T4N1M0 | IIIB | 2.67 | |
| BT195 | | 60 | F | Asian | 4520.004 | Weak | 5783.912 | + | Weak | Post | + | + | NA | 1 | T3N1M0 | IIIA | 2.47 | |
| BT139 | | 60 | F | Caucasian | 1128.184 | Weak | 5691.79 | + | - | Post | + | + | NA | 1 | T1NXM0 | I | 36.59 | |
| BT159 | | 41 | F | Caucasian | 2471.083 | Weak | 5438.79 | + | - | Pre | + | - | - | 1 | T2N1MX | IIB | 0.79 | |
| BT184 | | 58 | F | Caucasian | 2224.134 | Weak | 5324.619 | + | - | Post | + | + | NA | 1 | T2NXM0 | IIA | 17.16 | |
| BT95 | | 41 | F | Caucasian | 2492.305 | Weak | 5235.376 | + | Weak | Pre | + | + | NA | 1 | T2N1M0 | IIB | 26.34 | |
| BT194 | | 59 | F | Caucasian | 757.79 | Weak | 5173.548 | + | Weak | Post | + | + | - | 1 | T2N0M0 | IIA | 20.56 | |
| BT78 | | 65 | F | Caucasian | 2733.134 | Weak | 5156.276 | + | - | Post | + | + | - | 2 | T1bN0M0 | I | 8.46 | |
| BT198 | | 85 | F | Caucasian | 3963.154 | Weak | 5129.205 | + | - | Post | + | + | - | 1 | T2N2M0 | IIIA | 27.28 | |
| BT33 | | 36 | F | Caucasian | 1560.113 | Weak | 5128.376 | + | - | Pre | + | - | - | 1 | T1NXM0 | I | 6.12 | |
| BT56 | | 52 | F | Caucasian | 3790.569 | Weak | 5012.861 | + | - | Post | + | - | - | 2 | T1N1M0 | IIA | 42.00 | |
| BT104 | | 66 | F | Caucasian | 3019.205 | Weak | 4978.326 | + | - | Post | + | - | - | 2 | T2N0M0 | IIA | 11.38 | |
| BT151 | | 56 | F | Caucasian | 3159.79 | Weak | 4945.912 | + | - | Post | + | + | NA | 1 | T2NXM0 | IIA | 7.73 | |
| BT37 | | NA | F | Caucasian | 1304.903 | Weak | 4928.79 | + | - | Pre | + | + | + | 2 | T2N2M0 | IIIA |  | |
| BT84 | | NA | F | Caucasian | 1986.062 | Weak | 4888.74 | + | - | NA | + | + | NA | 1 | T1N1M0 | IIA | 9.91 | |
| BT50 | | 77 | F | Caucasian | 948.234 | Weak | 4887.962 | + | - | Post | + | + | - | 1 | T2N0M0 | IIA | 22.00 | |
| BT93 | | 66 | F | Caucasian | 2670.527 | Weak | 4879.083 | + | Weak | Post | + | + | - | 1 | T1N0M0 | I | 0.39 | |
| BT67 | | 52 | F | African American | 4346.033 | Weak | 4726.79 | + | - | Post | + | + | - | 1 | T2N2M0 | IIIA | 13.11 | |
| BT141 | | 64 | F | Caucasian | 2526.397 | Weak | 4521.669 | + | Weak | Post | + | + | NA | 1 | T2N1M0 | IIB | 29.34 | |
| BT131 | | NA | F | Caucasian | 1393.891 | Weak | 4469.376 | + | - | NA | + | + | NA | 1 | T2N1M0 | IIB | 6.00 | |
| BT13 | | 47 | F | Caucasian | 612.113 | Weak | 4397.083 | + | - | Pre | + | + | - | 1 | T2N1M0 | IIB | 22.74 | |
| BT4 | | 37 | F | Caucasian | 2924.79 | Weak | 4393.912 | + | - | NA | + | - | NA | 1 | T2N1MX | IIB | 21.15 | |
| BT154 | | 37 | F | Caucasian | 1108.841 | Weak | 4264.083 | + | - | Pre | + | + | NA | 1 | T2NXM0 | IIA | 34.64 | |
| BT163 | | 71 | F | Caucasian | 3511.79 | Weak | 4232.205 | + | - | Post | + | + | NA | 1 | T2NXMX | IIA | 13.29 | |
| BT148 | | 70 | F | Caucasian | 723.991 | Weak | 4029.426 | + | + | Post | + | + | NA | 1 | T4N2MX | IIIB | 30.75 | |
| BT116 | | 32 | F | Caucasian | 4004.74 | Weak | 4001.083 | - | - | Pre | + | + | + | 1 | T2N0M0 | IIA | 13.66 | |
| BT166 | | 69 | F | Caucasian | 1451.598 | Weak | 3962.326 | - | - | Post | + | + | NA | 1 | T1cN1M0 | IIA | 8.38 | |
| BT80 | | 64 | F | Caucasian | 2250.355 | Weak | 3871.497 | - | - | Post | + | + | - | 1 | T2N1M0 | IIB | 7.33 | |
| BT182 | | 39 | F | Caucasian | 2108.012 | Weak | 3833.497 | - | - | Pre | + | + | - | 1 | T2NXM0 | IIA | 4.14 | |
| BT119 | | 42 | F | Caucasian | 1591.012 | Weak | 3781.376 | - | - | Pre | + | + | - | 2 | T2N0M0 | IIA | 24.02 | |
| BT96 | | 56 | F | Caucasian | 2435.062 | Weak | 3728.083 | - | - | Post | + | + | - | 2 | T2N2M0 | IIIA | 17.57 | |
| BT9 | | NA | F | Caucasian | 1766.255 | Weak | 3714.79 | - | - | NA | + | + | - | 1 | T1N0M0 | I | 8.79 | |
| BT64 | | 46 | F | Caucasian | 2420.598 | Weak | 3615.326 | - | - | Pre | + | + | - | 1 | T1cNXM0 | I | 12.57 | |
| BT20 | | 56 | F | Caucasian | 921.255 | Weak | 3528.669 | - | - | Post | + | + | - | 1 | T1NXMX | I | 21.25 | |
| BT40 | | 68 | F | Caucasian | 3375.459 | Weak | 3437.962 | - | - | Post | + | + | - | 1 | T4NXM0 | IIIB | 5.70 | |
| BT127 | | 59 | F | Caucasian | 1539.891 | Weak | 3420.669 | - | Weak | Post | + | - | NA | 1 | T2N1MX | IIB | 5.00 | |
| BT7 | | 63 | F | Caucasian | 1852.527 | Weak | 3411.376 | - | + | Post | + | + | - | 2 | T2N0M0 | IIA |  | |
| BT31 | | 55 | F | Caucasian | 2954.288 | Weak | 3394.033 | - | - | Post | + | + | - | 1 | T2NXM0 | IIA | 18.00 | |
| BT107 | | 45 | F | Caucasian | 2222.184 | Weak | 3382.083 | - | - | Pre | + | - | - | 1 | T4N1M0 | IIIB | 8.06 | |
| BT111 | | 65 | F | Caucasian | 2496.134 | Weak | 3376.841 | - | + | Post | + | - | - | 1 | T1N0M0 | I | 39.37 | |
| BT55 | | 59 | F | Caucasian | 2082.305 | Weak | 3290.669 | - | - | NA | + | + | - | 2 | T1N1M0 | IIA | 6.50 | |
| BT82 | | 48 | F | Caucasian | 3094.891 | Weak | 3261.619 | - | - | NA | + | + | NA | 1 | T2N2M0 | IIIA | 33.25 | |
| BT197 | | 64 | F | Caucasian | 2634.012 | Weak | 3216.426 | - | - | Post | + | + | - | 2 | T1cN0M0 | I |  | |
| BT172 | | 44 | F | Caucasian | 576.456 | Weak | 3202.79 | - | - | Pre | + | + | - | 1 | T2N0M0 | IIA | 0.60 | |
| BT183 | | 52 | F | Asian | 2013.355 | Weak | 3160.376 | - | - | Post | + | + | NA | 1 | T2N2M0 | IIIA | 12.75 | |
| BT58 | | 65 | F | Caucasian | 3109.276 | Weak | 3106.669 | - | Weak | Post | + | + | - | 2 | T2NXMX | IIA | 8.00 | |
| BT102 | | 60 | F | Caucasian | 1414.012 | Weak | 3089.497 | - | - | Post | + | - | - | 1 | T2N1M0 | IIB | 70.97 | |
| BT28 | | 53 | F | Caucasian | 1753.083 | Weak | 3011.305 | - | - | Post | + | - | - | 1 | T1N1M0 | IIA | 3.00 | |
| BT168 | | 53 | F | Caucasian | 896.113 | Weak | 3006.962 | - | - | Post | + | - | NA | 1 | T1cN0MX | I | 9.78 | |
| BT101 | | 78 | F | Caucasian | 1079.355 | Weak | 2972.083 | - | - | Post | + | + | - | 1 | T2NXM0 | IIA | 11.01 | |
| BT47 | | 70 | F | Caucasian | 1997.891 | Weak | 2962.305 | - | - | Post | + | + | - | 1 | T1cNXM0 | I | 11.50 | |
| BT162 | | 47 | F | Caucasian | 2537.548 | Weak | 2892.376 | - | - | NA | + | + | NA | 1 | T1cN0M0 | I | 1.38 | |
| BT51 | | 47 | F | Caucasian | 510.062 | Weak | 2867.548 | - | Weak | Pre | + | + | - | 1 | T2N0M0 | IIA | 27.88 | |
| BT103 | | 74 | F | Caucasian | 1194.87 | Weak | 2775.79 | - | - | Post | + | - | - | 1 | T4N1M0 | IIIB | 13.12 | |
| BT62 | | 45 | F | Caucasian | 2863.962 | Weak | 2762.861 | - | - | Pre | + | + | - | 2 | T2NXMX | IIA | 6.20 | |
| BT34 | | 51 | F | Caucasian | 1639.234 | Weak | 2708.083 | - | - | Pre | + | + | - | 1 | T2NXM0 | II | 6.00 | |
| BT32 | | 39 | F | Caucasian | 805.406 | Weak | 2631.083 | - | - | Pre | + | + | - | 1 | T2NXM0 | IIA | 4.00 | |
| BT114 | | NA | F | Caucasian | 1437.456 | Weak | 2599.669 | - | - | Post | + | - | + | 1 | T2N0M0 | IIA | 0.59 | |
| BT75 | | 51 | F | Caucasian | 1088.406 | Weak | 2549.134 | - | - | Pre | + | + | - | 1 | T2N1M0 | IIB | 27.97 | |
| BT100 | | 70 | F | Caucasian | 2366.61 | Weak | 2499.548 | - | + | Post | + | + | - | 1 | T2N0M0 | IIA | 17.41 | |
| BT16 | | 51 | F | Caucasian | 765.062 | Weak | 2448.548 | - | - | Pre | + | - | - | 1 | T1N0M0 | I | 5.00 | |
| BT193 | | 52 | F | Caucasian | 1563.983 | Weak | 2395.255 | - | - | Post | + | - | NA | 1 | T2N0M0 | IIA | 59.92 | |
| BT11 | | 46 | F | Caucasian | 1592.205 | Weak | 2350.841 | - | - | Pre | + | + | - | 1 | T2N2M0 | IIIA | 13.06 | |
| BT30 | | 73 | F | Caucasian | 928.941 | Weak | 2306.012 | - | - | Post | + | - | - | 2 | T2NXM0 | IIA | 12.62 | |
| BT97 | | 51 | F | Caucasian | 2550.083 | Weak | 2270.841 | - | - | Post | + | - | - | 1 | T1NXM0 | I | 18.00 | |
| BT125 | | 66 | F | Caucasian | 1740.79 | Weak | 2254.719 | - | Weak | Post | + | - | NA | 1 | T2N1M0 | IIB | 12.98 | |
| BT142 | | 64 | F | Caucasian | 2102.497 | Weak | 2184.962 | - | Weak | Post | + | + | NA | 3 | T2NXMX | IIA | 8.13 | |
| BT147 | | 43 | F | Caucasian | 426.456 | Weak | 2130.426 | - | - | Post | + | - | NA | 1 | T4N2MX | IIIB | 3.43 | |
| BT60 | | 75 | F | Caucasian | 3002.962 | Weak | 2120.426 | - | - | Post | + | - | - | 1 | T2N1M0 | IIB | 7.32 | |
| BT69 | | 45 | F | Caucasian | 4169.501 | Weak | 2018.134 | - | - | NA | + | - | - | 1 | T2N0M0 | IIA | 12.98 | |
| BT25 | | 48 | F | Caucasian | 812.234 | Weak | 2011.77 | - | Weak | Pre | + | + | - | 1 | T2NXM0 | IIA | 27.20 | |
| BT5 | | 49 | F | Caucasian | 667.406 | Weak | 1966.719 | - | - | Pre | + | + | - | 1 | T1cNXM0 | I |  | |
| BT200 | | 66 | F | Caucasian | 1297.246 | Weak | 1881.598 | - | - | Post | + | + | - | 1 | T1N0MX | I | 13.14 | |
| BT29 | | 52 | F | Caucasian | 612.749 | Weak | 1850.184 | - | - | Pre | + | + | - | 1 | T2NXM0 | IIA | 6.18 | |
| BT126 | | 51 | F | Caucasian | 1306.719 | Weak | 1825.719 | - | - | Post | + | - | NA | 1 | T2N1MX | IIB | 28.48 | |
| BT123 | | 69 | F | Caucasian | 689.355 | Weak | 1633.77 | - | - | Pre | + | + | - | 1 | T3N0M0 | IIB | 7.55 | |
| BT120 | | 55 | F | Caucasian | 1132.234 | Weak | 1622.598 | - | - | Post | + | + | - | 1 | T2N2M0 | IIIA | 6.68 | |
| BT6 | | 70 | F | Caucasian | 757.669 | Weak | 1460.184 | - | - | Post | + | + | - | 2 | T2N2M0 | IIIA | 10.97 | |
| BT98 | | 51 | F | Caucasian | 1522.841 | Weak | 1329.255 | - | - | Post | + | + | - | 1 | T1NXM0 | I | 9.07 | |
| BT171 | | 71 | F | Caucasian | 472.092 | Weak | 838.941 | - | - | Post | + | - | NA | 1 | T1cN2M0 | IIIA | 2.93 | |
| BT74 | | 37 | F | Caucasian | 453.627 | Weak | 800.82 | - | - | Pre | + | + | - | 1 | T3N1M0 | IIIA | 17.67 | |
| BT186 | | 56 | F | Caucasian | 374.66 | - | 7750.083 | + | - | Post | + | + | NA | 1 | T3N0M0 | IIB | 20.97 | |
| BT46 | | 70 | F | Caucasian | 402.589 | - | 6816.376 | + | Weak | Post | + | - | NA | 1 | T2N1M0 | IIB | 17.00 | |
| BT15 | | 32 | F | Caucasian | 303.184 | - | 6256.79 | + | - | Pre | + | - | + | 1 | T2NXM0 | IIA | 22.39 | |
| BT138 | | 68 | F | Caucasian | 364.74 | - | 5969.205 | + | - | Post | + | + | NA | 1 | T2N2M0 | IIIA | 38.32 | |
| BT180 | | 44 | F | Asian | 330.882 | - | 5606.497 | + | - | Pre | + | - | + | 1 | T2NXMX | IIA | 47.36 | |
| BT19 | | 53 | F | Caucasian | 302.083 | - | 5401.376 | + | - | Pre | + | + | NA | 1 | T1cN1MX | IIA | 28.00 | |
| BT92 | | 69 | F | Caucasian | 358.184 | - | 5362.326 | + | - | Post | + | - | NA | 1 | T1N2M0 | IIIA | 24.07 | |
| BT140 | | 69 | F | Caucasian | 425.255 | - | 4828.962 | + | - | Post | + | + | NA | 1 | T2NXM0 | IIA | 53.42 | |
| BT48 | | 56 | F | Caucasian | 363.125 | - | 4435.669 | + | + | NA | + | - | - | 1 | T1NXM0 | I | 28.96 | |
| BT153 | | 72 | F | Caucasian | 401.861 | - | 4348.497 | + | - | Post | + | + | - | 3 | T1N0M0 | I | 11.84 | |
| BT71 | | 53 | F | Caucasian | 262.497 | - | 4265.912 | + | - | Pre | + | + | - | 1 | T2N0MX | IIA | 10.62 | |
| BT191 | | 63 | F | Caucasian | 331.004 | - | 4193.376 | + | Weak | Post | + | - | - | 1 | T3N2M0 | IIIA | 0.00 | |
| BT22 | | 40 | F | Caucasian | 279.326 | - | 4088.79 | + | Weak | NA | + | + | - | 1 | T1cN1M0 | IIA | 25.13 | |
| BT61 | | 79 | F | Caucasian | 235.255 | - | 4058.74 | + | - | Post | + | + | - | 2 | T4N2M0 | IIIB | 19.00 | |
| BT177 | | 70 | F | Caucasian | 390.882 | - | 4041.912 | + | - | Post | + | + | NA | 1 | T2N0M0 | IIA | 15.68 | |
| BT176 | | 42 | F | Caucasian | 367.731 | - | 3878.205 | - | - | Pre | + | + | NA | 1 | T1cNXM0 | I | 56.76 | |
| BT178 | | 56 | F | Caucasian | 342.882 | - | 3750.033 | - | - | Post | + | + | - | 1 | T1NXM0 | I | 38.34 | |
| BT185 | | 43 | F | Caucasian | 381.347 | - | 3723.326 | - | - | Pre | + | + | NA | 1 | T2NXM0 | IIA | 11.13 | |
| BT161 | | 54 | F | Caucasian | 389.782 | - | 3711.376 | - | - | Post | + | + | - | 2 | T2N1M0 | IIB | 20.62 | |
| BT158 | | 59 | F | Caucasian | 395.539 | - | 3703.083 | - | - | Post | + | + | NA | 1 | T1cNXM0 | I | 13.22 | |
| BT167 | | 47 | F | Caucasian | 401.731 | - | 3590.083 | - | - | NA | + | + | NA | 1 | T1cN2M0 | IIIA | 0.40 | |
| BT188 | | 54 | F | Caucasian | 294.439 | - | 3553.426 | - | - | Post | + | + | NA | 2 | T2N0M0 | IIA | 2.12 | |
| BT89 | | 79 | F | Caucasian | 379.77 | - | 3398.083 | - | - | Post | + | - | NA | 1 | T4N1M0 | IIIB | 31.73 | |
| BT129 | | 50 | F | Caucasian | 354.841 | - | 3261.619 | - | - | Post | + | - | + | 2 | T2N0M0 | IIA | 19.00 | |
| BT42 | | 45 | F | Caucasian | 410.477 | - | 3135.548 | - | - | Pre | + | + | - | 2 | T2N1M0 | IIB | 30.00 | |
| BT156 | | 30 | F | Caucasian | 394.569 | - | 3125.669 | - | - | Pre | + | + | NA | 1 | T1N0M0 | I | 8.42 | |
| BT17 | | 69 | F | Caucasian | 380.468 | - | 2943.669 | - | - | Post | + | + | - | 2 | T2N0M0 | IIA | 16.60 | |
| BT179 | | 50 | F | Caucasian | 319.125 | - | 2803.205 | - | - | Pre | + | + | NA | 1 | T1cN1M0 | IIA | 22.13 | |
| BT187 | | 67 | F | Caucasian | 325.731 | - | 2702.548 | - | - | Post | + | - | + | 2 | T1cN0M0 | I | 4.28 | |
| BT149 | | 37 | F | Caucasian | 312.648 | - | 2692.841 | - | - | Pre | + | + | NA | 1 | T1N0MX | I | 6.70 | |
| BT196 | | 49 | F | Caucasian | 331.175 | - | 2673.598 | - | + | Post | + | + | - | 2 | T2N0M0 | IIA | 7.98 | |
| BT192 | | 66 | F | Caucasian | 320.74 | - | 2618.255 | - | - | Post | + | - | - | 2 | T4NXM0 | IIIB | 12.94 | |
| BT90 | | 88 | F | Caucasian | 329.234 | - | 2606.669 | - | - | Post | + | + | - | 1 | T1N0M0 | I | 10.99 | |
| BT169 | | NA | F | Caucasian | 407.246 | - | 2555.255 | - | - | Post | + | + | NA | 3 | T1N0M0 | I | 12.42 | |
| BT41 | | 41 | F | Caucasian | 232.234 | - | 2487.841 | - | - | Pre | + | + | - | 1 | T2NXM0 | IIA | 20.70 | |
| BT18 | | 53 | F | Caucasian | 407.569 | - | 2410.134 | - | - | Pre | + | + | - | 1 | T2N0M0 | IIA | 2.06 | |
| BT12 | | NA | F | Caucasian | 274.205 | - | 2355.012 | - | Weak | Post | + | - | - | 1 | T1cN1MX | IIA | 7.00 | |
| BT83 | | 47 | F | Caucasian | 469.134 | - | 2337.669 | - | - | NA | + | - | + | 1 | T1cN0M0 | I | 6.43 | |
| BT117 | | 59 | F | Caucasian | 406.669 | - | 2275.548 | - | - | Post | + | + | - | 2 | T2N0M0 | IIA | 12.00 | |
| BT157 | | 48 | F | Caucasian | 341.225 | - | 2263.841 | - | - | Post | + | + | NA | 1 | T1cN0M0 | I | 10.30 | |
| BT10 | | 74 | F | Caucasian | 302.962 | - | 2235.012 | - | - | Post | + | + | - | 1 | T2NXM0 | IIA | 6.00 | |
| BT105 | | 58 | F | Caucasian | 352.083 | - | 2225.548 | - | - | Pre | + | + | - | 1 | T1cN1M0 | IIA | 2.00 | |
| BT27 | | 74 | F | Caucasian | 365.113 | - | 2207.477 | - | - | Post | + | - | - | 2 | T1N1M0 | IIA | 3.81 | |
| BT124 | | 50 | F | Caucasian | 335.569 | - | 2198.669 | - | - | Post | + | + | - | 1 | T2N0M0 | IIA | 17.25 | |
| BT99 | | 39 | F | Caucasian | 417.74 | - | 2173.012 | - | - | Pre | + | + | NA | 1 | T2NXM0 | IIA | 23.87 | |
| BT68 | | 68 | F | Caucasian | 350.477 | - | 2168.548 | - | - | Post | + | - | - | 1 | T3N1M0 | IIIA | 0.99 | |
| BT91 | | 45 | F | Caucasian | 313.305 | - | 2100.669 | - | - | Pre | + | + | - | 1 | T2N2M0 | IIIA | 10.66 | |
| BT134 | | 75 | F | Caucasian | 376.355 | - | 2068.184 | - | - | Post | + | + | NA | 1 | T2NXMX | IIA | 0.60 | |
| BT190 | | 51 | F | Caucasian | 386.095 | - | 1981.719 | - | - | Post | + | + | + | 1 | T2N2M0 | IIIA | 17.59 | |
| BT77 | | 56 | F | Caucasian | 423.134 | - | 1922.426 | - | - | NA | + | + | - | 1 | T2N1M0 | IIB | 6.76 | |
| BT73 | | 50 | F | Caucasian | 408.962 | - | 1895.062 | - | - | Pre | + | + | - | 1 | T2N3M0 | IIIC | 10.17 | |
| BT54 | | 42 | F | Caucasian | 362.962 | - | 1822.012 | - | - | Pre | + | - | - | 1 | T1N0M0 | I | 2.12 | |
| BT133 | | 51 | F | Caucasian | 398.497 | - | 1801.426 | - | - | Post | + | + | + | 1 | T1N0M0 | I | 28.46 | |
| BT112 | | 41 | F | Caucasian | 373.205 | - | 1766.648 | - | - | Pre | + | + | - | 2 | T2N0M0 | IIA | 0.99 | |
| BT66 | | 43 | F | Caucasian | 373.426 | - | 1681.012 | - | - | Pre | + | + | - | 1 | T2N0M0 | IIA | 0.60 | |
| BT8 | | 51 | F | Caucasian | 334.184 | - | 1618.648 | - | - | NA | + | - | - | 2 | T1N0M0 | I | 0.40 | |
| BT2 | | 68 | F | Caucasian | 409.598 | - | 1613.891 | - | - | Post | + | - | - | 2 | T1cNXM0 | I | 12.98 | |
| BT81 | | 67 | F | Caucasian | 390.497 | - | 1590.426 | - | - | Post | + | + | - | 2 | T2N0M0 | IIA | 0.20 | |
| BT115 | | 61 | F | Caucasian | 381.305 | - | 1568.598 | - | - | Post | + | + | - | 1 | T2N0MX | IIA | 0.60 | |
| BT128 | | 50 | F | Caucasian | 352.447 | - | 1510.477 | - | - | Post | + | + | NA | 2 | T1N1M0 | IIA | 12.00 | |
| BT136 | | 77 | F | Caucasian | 413.255 | - | 1505.941 | - | - | Post | + | + | NA | 1 | T1NXM0 | I | 6.74 | |
| BT94 | | 54 | F | Caucasian | 350.962 | - | 1473.891 | - | - | Pre | + | + | - | 3 | T4N3M0 | IIIC | 7.14 | |
| BT85 | | NA | F | Caucasian | 403.648 | - | 1461.012 | - | - | NA | + | - | NA | 1 | T2NXM0 | IIA | 11.05 | |
| BT199 | | 53 | F | Caucasian | 303.184 | - | 1460.134 | - | - | Post | + | + | + | 1 | T4N1M0 | IIIB | 0.96 | |
| BT152 | | 86 | F | Caucasian | 309.426 | - | 1440.184 | - | - | Post | + | - | - | 1 | T2NXM0 | IIA | 0.40 | |
| BT118 | | 43 | F | Caucasian | 328.598 | - | 1398.941 | - | - | Post | + | + | - | 1 | T4N1M0 | IIIB | 9.26 | |
| BT76 | | 55 | F | Caucasian | 294.899 | - | 1327.355 | - | - | Post | + | + | - | 1 | T2N0M0 | IIA | 10.10 | |
| BT43 | | 74 | F | Caucasian | 347.376 | - | 1248.648 | - | - | Post | + | + | NA | 1 | T2N1M0 | IIB | 22.00 | |
| BT150 | | 67 | F | Caucasian | 322.79 | - | 1165.648 | - | - | Post | + | + | NA | 1 | T2N1M0 | IIB | 4.44 | |
| BT53 | | 36 | F | Asian | 326.426 | - | 1107.355 | - | - | Pre | NA | NA | NA | 1 |  |  |  | |
| BT175 | | 37 | F | Caucasian | 406.213 | - | 988.355 | - | - | Pre | + | + | NA | 1 | T1cN1M0 | IIA | 27.07 | |
| BT170 | | 70 | F | Caucasian | 436.66 | - | 978.527 | - | - | Post | + | + | - | 2 | T2N3M0 | IIIC | 2.96 | |
| BT39 | | 44 | F | Caucasian | 422.376 | - | 969.234 | - | - | Pre | + | + | - | 1 | T1N1M0 | IIA | 32.50 | |
| BT65 | | 59 | F | Caucasian | 325.205 | - | 813.406 | - | - | Post | + | + | - | 1 | T1NXM0 | I | 11.40 | |
| BT38 | | 62 | F | Caucasian | 472.205 | - | 715.113 | - | - | Post | + | - | NA | 1 | T1cNXM0 | I | 13.44 | |
| BT146 | | 65 | F | Caucasian | 377.991 | - | 708.406 | - | - | Post | + | + | NA | 2 | T2N1M0 | IIB | 6.24 | |
| BT155 | | 68 | F | Caucasian | 376.64 | - | 688.627 | - | - | Post | + | - | + | 2 | T1cN0M0 | I | 2.95 | |
| BT122 | | 53 | F | Caucasian | 312.154 | - | 562.456 | - | - | Post | + | + | - | 2 | T2N0M0 | IIA |  | |
| BT87 | | 53 | F | Caucasian | 374.941 | - | 558.092 | - | - | Post | + | + | - | 1 | T1NXM0 | I | 18.34 | |
| BT1 | | 75 | F | Caucasian | 439.012 | - | 514.749 | - | - | Post | + | + | - | 1 | T2NXM0 | IIA | 9.73 | |
| BT174 | | 45 | F | Caucasian | 402.397 | - | 441.627 | - | - | NA | + | - | - | 3 | T1cN0M0 | I | 0.99 | |
| BT145 | | 53 | F | Caucasian | 367.012 | - | 406.627 | - | - | Post | + | + | NA | 1 | T1cNXMX | IC | 27.85 | |
| BT173 | | 63 | F | Caucasian | 345.368 | - | 400.263 | - | - | Post | + | + | + | 1 | T1cN0M0 | I | 13.27 | |
| BT121 | | 72 | F | Caucasian | 321.912 | - | 394.506 | - | - | Post | + | + | - | 1 | T2NXM0 | IIA | 10.97 | |
| BT49 | | 47 | F | Caucasian | 244.305 | - | 373.627 | - | - | Post | + | + | - | 1 | T2N2M0 | IIIA | 32.00 | |
| BT63 | | 79 | F | Caucasian | 259.255 | - | 330.607 | - | - | Post | + | + | - | 2 | T2NXM0 | IIA | 18.73 | |
| BT3 | | 64 | F | Caucasian | 325.962 | - | 289.142 | - | - | Post | + | - | - | 2 | T1NXM0 | I | 0.40 | |
| BT86 | | 81 | F | Caucasian | 326.113 | - | 254.607 | - | - | Post | + | + | - | 1 | T2N1aM0 | IIB | 0.20 | |

**Supplementary Table S4. Primer sequences and amplification conditions used in RT-PCR or real-time PCR analyses.**

| **RT-PCR** | | |
| --- | --- | --- |
| **Gene** | **RAD51AP1-DYRK4** | |
| Primers sequence | Forward | 5'-CAAGCCTTGAAAGGGACCAT-3' |
| Reverse | 5'-CCAACCTTCGCAGAGGTGAA-3' |
| PCR amplification conditions | 1 cycle | 94°C: 2 minutes |
| 35 cycles | 94°C: 15 seconds |
| 60°C: 30 seconds |
| 68°C: 2 minutes |
| 1 cycle | 68°C: 5 minutes |
| **Gene** | **wtRAD51AP1** | |
| Primers sequence | Forward | 5'-GCCGTCAAATCAGAATCTCAGTC-3' |
| Reverse | 5'-AAGCTGTGATTCTCCCAACCAA-3' |
| PCR amplification conditions | 1 cycle | 94°C: 2 minutes |
| 35 cycles | 94°C: 15 seconds |
| 60°C: 30 seconds |
| 68°C: 2 minutes |
| 1 cycle | 68°C: 5 minutes |
| **Gene** | **wtDYRK4** | |
| Primers sequence | Forward | 5'-CCAGACCCTGAGGAAATCCA-3' |
| Reverse | 5'-CTGACTTCTTGGGAGCGTCT-3' |
| PCR amplification conditions | 1 cycle | 94°C: 2 minutes |
| 35 cycles | 94°C: 15 seconds |
| 60°C: 30 seconds |
| 72°C: 2 minutes |
| 1 cycle | 72°C: 5 minutes |
| **Gene** | **GAPDH** | |
| Primers sequence | Forward | 5'-CCCACTCCTCCACCTTTGAC-3' |
| Reverse | 5'-TCCTCTTGTGCTCTTGCTGG-3' |
| PCR amplification conditions | 1 cycle | 94°C: 2 minutes |
| 30 cycles | 94°C: 15 seconds |
| 60°C: 30 seconds |
| 72°C: 2 minutes |
| 1 cycle | 72°C: 5 minutes |
|  |  |  |
| **Real-time PCR** | | |
| **Gene** | **RAD51AP1-DYRK4 (E9E2)** | |
| Primers sequence | Forward | 5'-AGCTGCCGTCAAATCAGAAT-3' |
| Reverse | 5'-CCAGGAAGGGAGTCAAATCA-3' |
| PCR amplification conditions | 1 cycle | 94°C: 10 minutes |
| 40 cycles | 94°C: 15 seconds |
| 60°C: 30 seconds |
| 68°C: 1 minutes |
| Melting curve | 95°C: 15 seconds, 60°C: 1 minute, 95°C: 15 seconds. |
| **Gene** | **RAD51AP1-DYRK4 (E9E2, E8sE2, E8E2))** | |
| Primers sequence | Forward | 5'-TGTGAGAGTGAGGATAATGACGAA-3' |
| Reverse | 5'-CCAGGAAGGGAGTCAAATCACA-3' |
| PCR amplification conditions | 1 cycle | 94°C: 10 minutes |
| 40 cycles | 94°C: 15 seconds |
| 60°C: 30 seconds |
| 68°C: 1 minutes |
| Melting curve | 95°C: 15 seconds, 60°C: 1 minute, 95°C: 15 seconds. |
| **Gene** | **wtRAD51AP1** | |
| Primers sequence | Forward | 5'-GCCGTCAAATCAGAATCTCAGTC-3' |
| Reverse | 5'-AAGCTGTGATTCTCCCAACCAA-3' |
| PCR amplification conditions | 1 cycle | 94°C: 10 minutes |
| 40 cycles | 94°C: 15 seconds |
| 60°C: 30 seconds |
| 68°C: 1 minutes |
| Melting curve | 95°C: 15 seconds, 60°C: 1 minute, 95°C: 15 seconds. |
| **Gene** | **wtDYRK4** |  |
| Primers sequence | Forward | 5'-GCACCGGAACAAAGACTCAA-3' |
| Reverse | 5'-ACTTGGGTCATTCTGGAGTTCT-3' |
| PCR amplification conditions | 1 cycle | 94°C: 10 minutes |
| 40 cycles | 94°C: 15 seconds |
| 60°C: 30 seconds |
| 68°C: 1 minutes |
| Melting curve | 95°C: 15 seconds, 60°C: 1 minute, 95°C: 15 seconds. |
| **Gene** | **GAPDH** | |
| Primers sequence | Forward | 5'-CCCACTCCTCCACCTTTGAC-3' |
| Reverse | 5'-TCCTCTTGTGCTCTTGCTGG-3' |
| PCR amplification conditions | 1 cycle | 94°C: 10 minutes |
| 40 cycles | 94°C: 15 seconds |
| 60°C: 30 seconds |
| 68°C: 1 minutes |
| Melting curve | 95°C: 15 seconds, 60°C: 1 minute, 95°C: 15 seconds. |

**Supplementary TableS5. Primary antibodies used in western blots.**

| Name | Manufacturer | Catalog no. | Species | Type | Clone |
| --- | --- | --- | --- | --- | --- |
| RAD51AP1 | GeneTex | GTX115455 | Rabbit | Polyclonal | N1C1 |
| MAP3K1 | Bethyl | A302-395A | Rabbit | Polyclonal |  |
| ITGB1 | Cell Signaling Technology | 9699 | Rabbit | Polyclonal | D2E5 |
| Anti-Flag | Cell Signaling Technology | 8146 | Mouse | Monoclonal | 9A3 |
| GAPDH | Santa Cruz | sc-32233 | Mouse | Monoclonal | 6C5 |
| ORC2 | BD Biosciences | 559266 | Rabbit | Polyclonal |  |
| HER2 | Cell Signaling Technology | 4290 | Rabbit | Polyclonal | D8F12 |
| pHER2(Y1248) | Cell Signaling Technology | 2247 | Rabbit | Polyclonal |  |
| PI3K-P85 | Cell Signaling Technology | 4257 | Rabbit | Polyclonal | 19H8 |
| pPI3K-P85 | Cell Signaling Technology | 4228 | Rabbit | Polyclonal |  |
| AKT | Cell Signaling Technology | 4691 | Rabbit | Polyclonal | C67E7 |
| pAKT(S473) | Cell Signaling Technology | 4060 | Rabbit | Polyclonal | D9E |
| pAKT(T308) | Cell Signaling Technology | 4056 | Rabbit | Polyclonal | 244F9 |
| Raptor | Cell Signaling Technology | 2280 | Rabbit | Polyclonal | 24C12 |
| pRaptor(S863) | Signalway | 12778-1 | Rabbit | Polyclonal |  |
| ERK | Cell Signaling Technology | 4695 | Rabbit | Polyclonal | 137F5 |
| pERK(T202/Y204) | Cell Signaling Technology | 4370 | Rabbit | Polyclonal | D13.14.4E |
| MEK1/2 | Cell Signaling Technology | 9122 | Rabbit | Polyclonal |  |
| pMEK1/2(S217/221) | Cell Signaling Technology | 9154 | Rabbit | Polyclonal | 41G9 |
| p-JNK(T183/Y185) | Cell Signaling Technology | 4668 | Rabbit | Polyclonal | 81E11 |
| SAPK/JNK | Cell Signaling Technology | 9252 | Rabbit | Polyclonal |  |
| p-c-Jun (S63) | Cell Signaling Technology | 2361 | Rabbit | Polyclonal | 54B3 |
| c-Jun | Cell Signaling Technology | 9165 | Rabbit | Polyclonal | 60A8 |
| DYRK4 | Abcam | 129866 | Rabbit | Polyclonal |  |
